# Supplementary material for: Semi-synthetic glycoconjugate vaccine candidate against Cryptococcus neoformans
Source: PubMed Central journal article supplement — bioRxiv. 2024 Feb 3:2024.02.02.578725. Preprint. [Version 1] doi: 10.1101/2024.02.02.578725 (PMC10862886; doi:10.1101/2024.02.02.578725), 2024-02-03
Supplement: NIHPP2024.02.02.578725v1-supplement-1.pdf [file NIHPP2024.02.02.578725v1-supplement-1.pdf]

## Supporting Figures

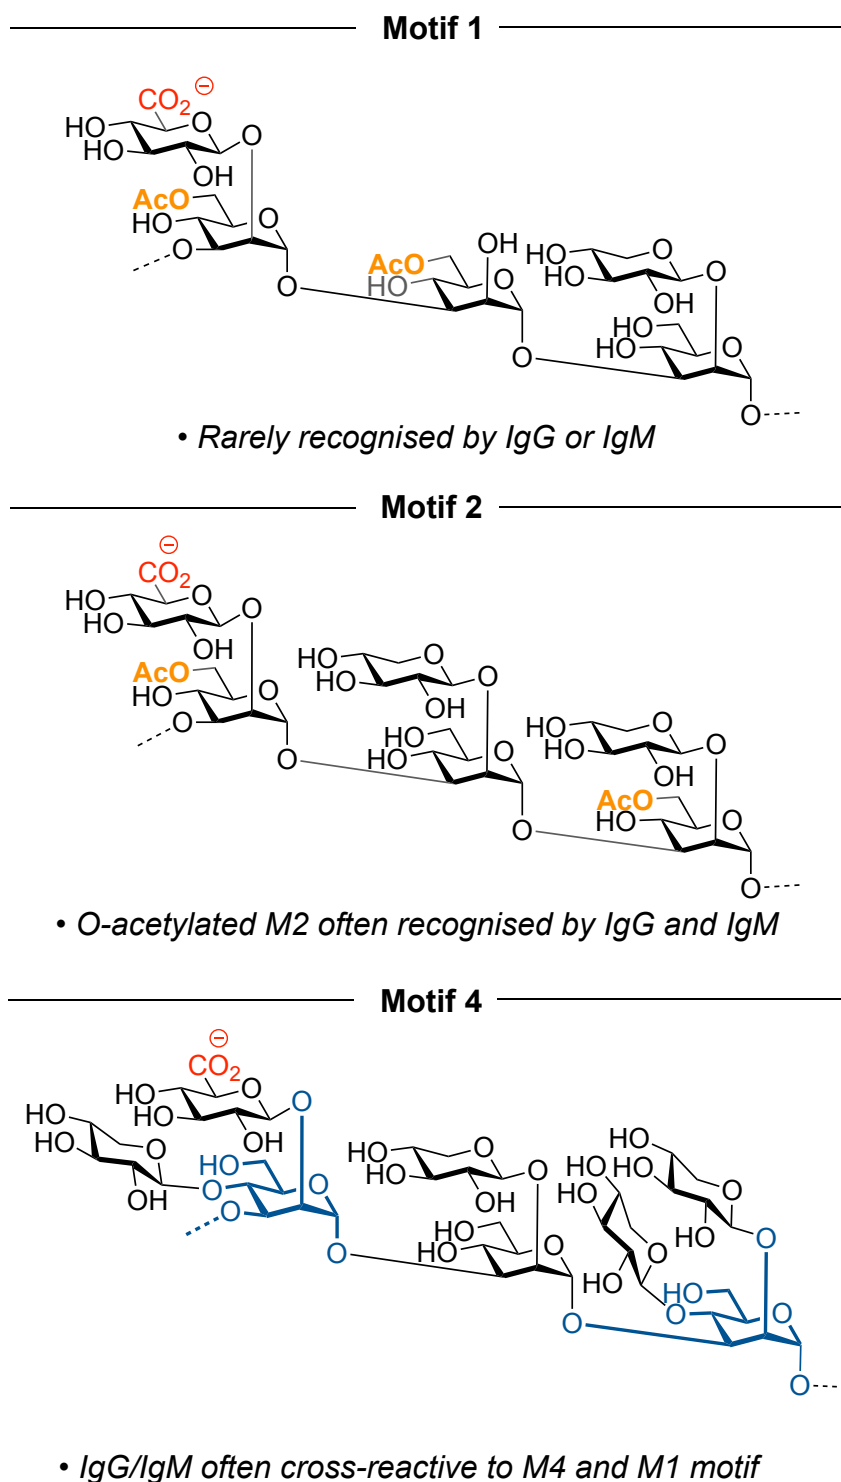

**SI Figure 1. GXM motifs.** GXM motifs (M1, M2 and M4), demonstrating the antigenic diversity found in the capsule of *C. neoformans*.

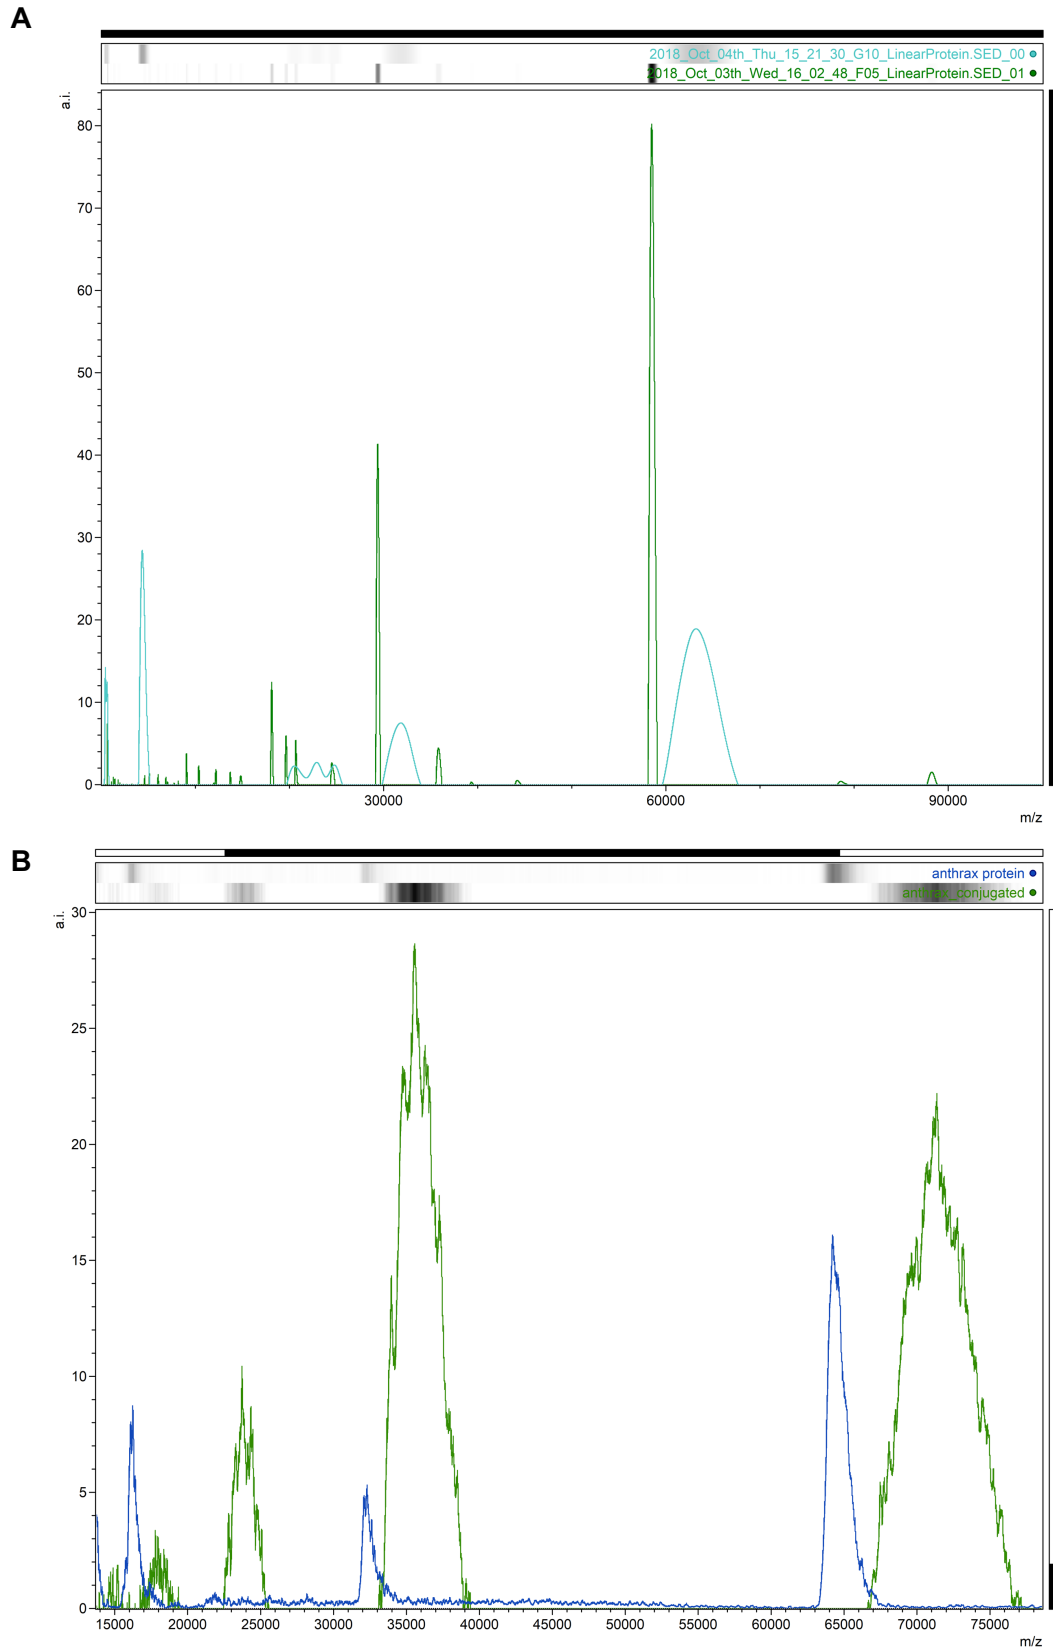

**SI Figure 2. MALDI-TOF of glycoconjugates DECA-CRM197 and DECA-PA63. A.** DECA-CRM197, shown in green is CRM197 and in blue DECA-CRM197. **b** DECA-PA63 conjugate, shown in green is DECA-PA63 and blue is PA63.

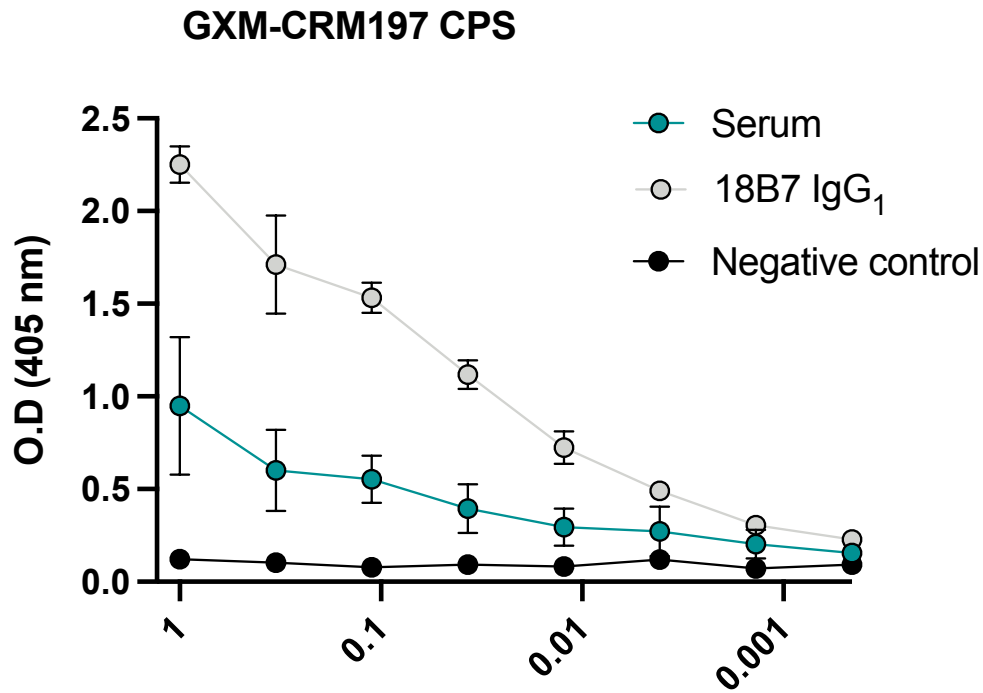

**SI Figure 3. ELISA with capsular polysaccharide and DECA-CRM197 conjugates.** Serum from DECA-CRM197 was examined for binding to CPS-coated ELISA plates and exhibited a higher affinity. Positive control: mAb 18B7; Negative control: irrelevant mAb.

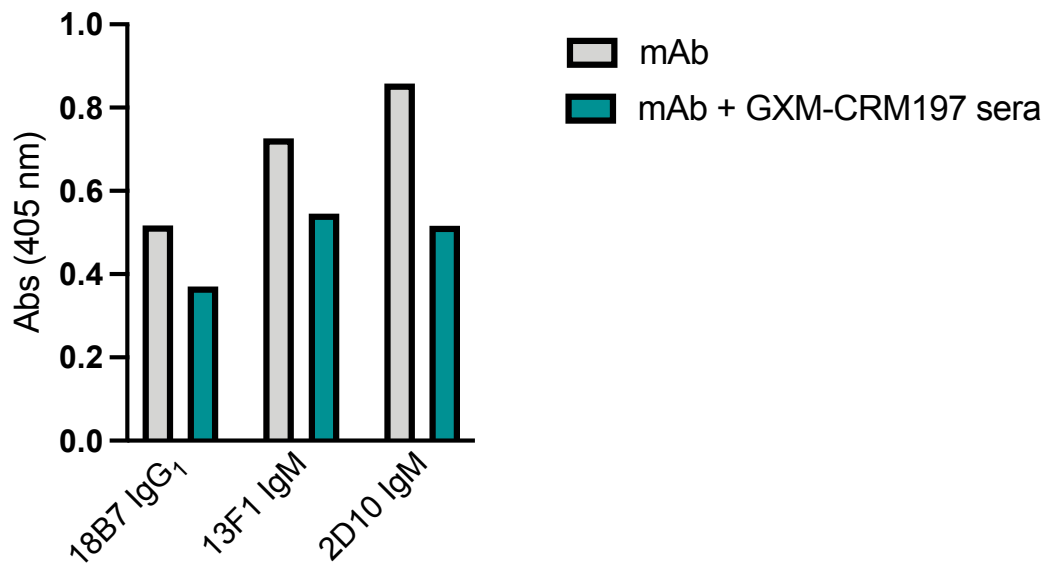

**SI Figure 4. Competition ELISA between mAbs and sera.** Serum from DECA-CRM197 mice vs mAbs 18B7 (IgG<sub>1</sub>), 13F1 (IgM) and 2D10 (IgM) showed that all three mAbs could compete for the same epitopes.

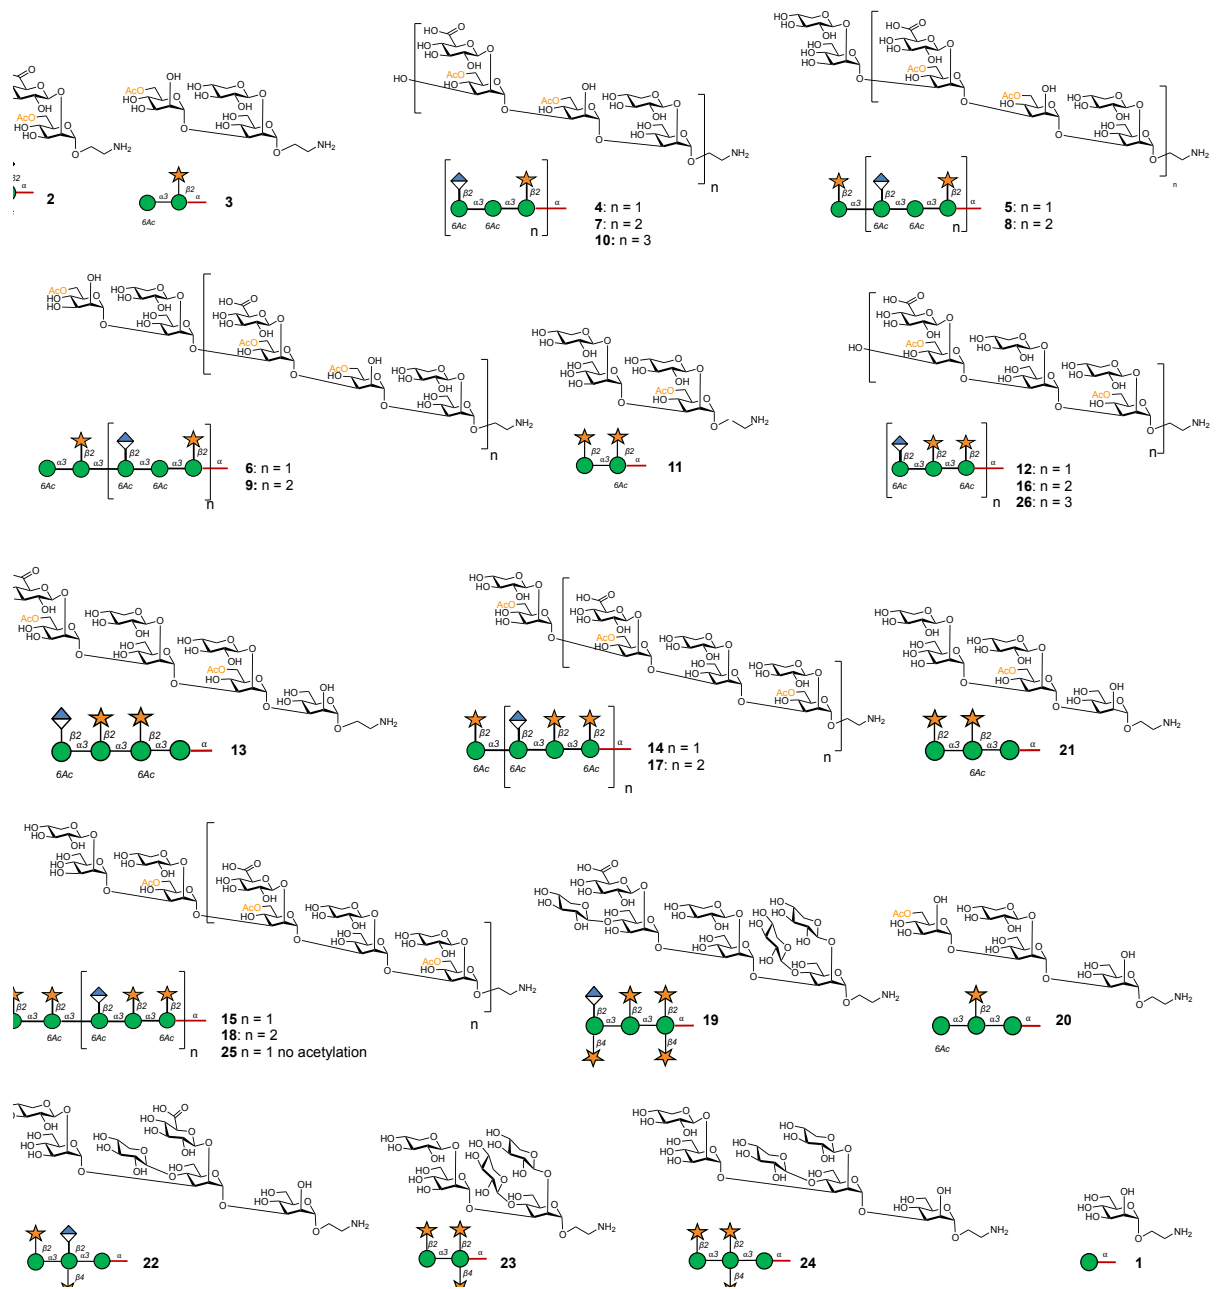

**SI Figure 5. Glucuronoxylomannan glycan microarray library.** Full library of the oligosaccharides GXM structures.
